# Supplementary material for: Severe congenital microcephaly with AP4M1 mutation, a case report
Source: Springer Nature journal article supplement (doi:10.1186/s12881-017-0412-9), 2017-05-02
Supplement: MOESM1 [file 12260504]

|           |         |          |          |
|-----------|---------|----------|----------|
| ARHGAP11B | CEP250  | MYCN     | SLC25A19 |
| ASPM      | CEP63   | NBN      | SLC9A6   |
| ATR       | CIT     | NDE1     | SMC1A    |
| ATRIP     | COX7B   | NIN      | SMC3     |
| BLM       | DYRK1A  | NIPBL    | STAMPB   |
| BRAT1     | EFTUD2  | ORC1     | STIL     |
| BUB1B     | EIF2AK3 | ORC4     | TRMT10A  |
| CASC5     | ERCC3   | ORC6     | TUBA1A   |
| CASK      | ERCC4   | PCNT     | TUBB     |
| CCDC7     | ERCC5   | PHC1     | TUBB2B   |
| CDC6      | ERCC6   | PLK4     | TUBB3    |
| CDK5RAP2  | ERCC8   | PNKP     | TUBG1    |
| CDT1      | IER3IP1 | PPM1D    | TUBGCP4  |
| CENPF     | KIF11   | RAD50    | TUBGCP6  |
| CENPJ     | KMT2B   | RBBP8    | UBE3A    |
| CEP135    | LIG4    | RNU4ATAC | WDR62    |
| CEP152    | MCPH1   | SASS6    | ZEB2     |

**Additional file 1:** 68 primary microcephaly-associated genes used for initial analysis of whole exome sequencing data
